# Supplementary material
Source: publisher figshare collection journal article supplement (https://acs.figshare.com/ndownloader/files/5079286)
Supplement: Supplementary file 1 [file 5079286]

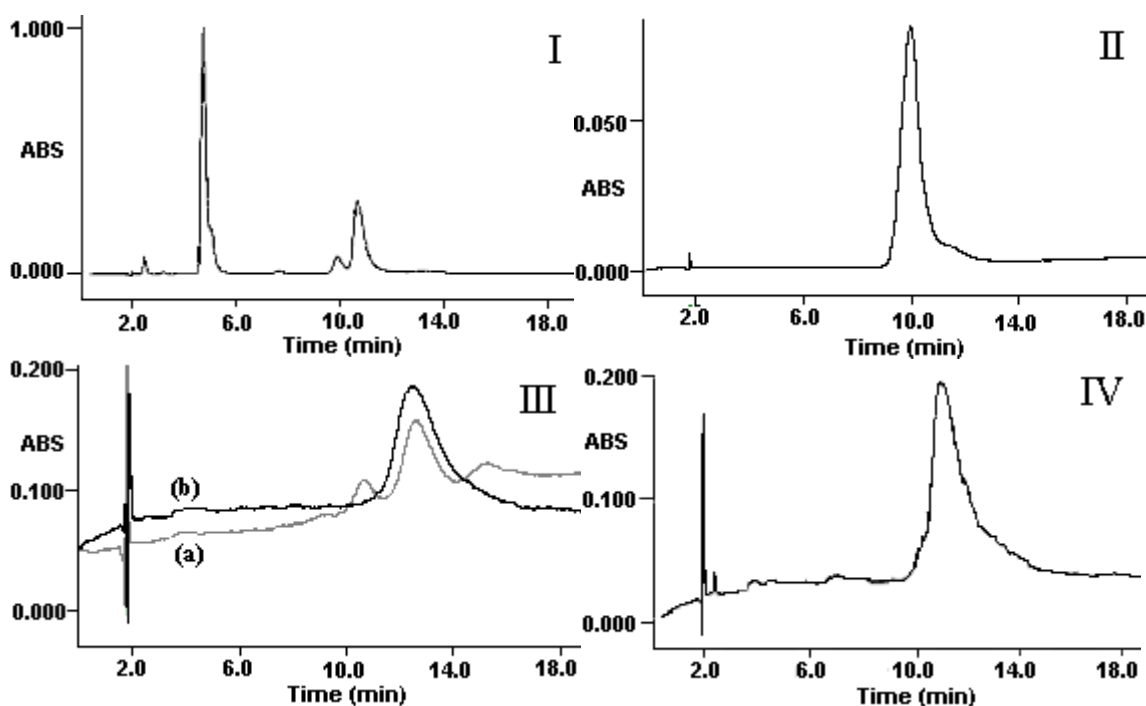

**Figure S9.** HPLC analysis of dimethyl esters **I**, a mixture of isomers, and **II**. Reaction products of BRDE **III** and **IV**: **I** BRDE,  $7.4 \times 10^{-4}$  M, at 402 nm with a flow rate of 1.0 mL/min, 60:40 (v:v) hexane: ethyl acetate on a 5  $\mu$ m silica adsorption column, 25 cm. x 4.6 mm. **II** BVDE,  $3.75 \times 10^{-4}$  M, at 658nm with a flow rate of 1.5 mL/min. **III(a)** Reaction mixture from the peroxidation of BRDE,  $7.7 \times 10^{-4}$  M, under oxygen, initiated by AIBN,  $2.7 \times 10^{-2}$  M, in toluene at 80 °C for 60 minutes. Analysis was run at 658 nm with a flow rate of 1.5 mL/min. **III(b)** Sample from **III(a)** mixture with known BVDE at 658 nm with a flow rate of 1.5 mL/min. **IV** Reaction product from the reaction of BRDE with DPPH $\cdot$  (molar ratio of BRDE:DPPH $\cdot$ , 2:1), under argon in toluene, at 658 nm with a flow rate of 1.5 mL/min. The analysis at 402 nm of this sample indicated unreacted BRDE (not shown).
